# Supplementary material for: Adenosine/TGFβ axis in regulation of mammary fibroblast functions
Source: PubMed Central journal article supplement (PMC8186761; doi:10.1371/journal.pone.0252424), 2021-06-08

**A, left (WT)**

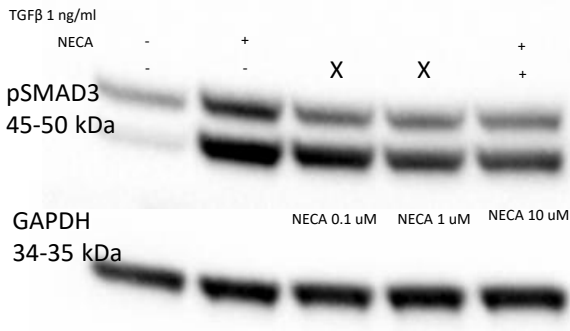

**A, center (A2a-KO)**

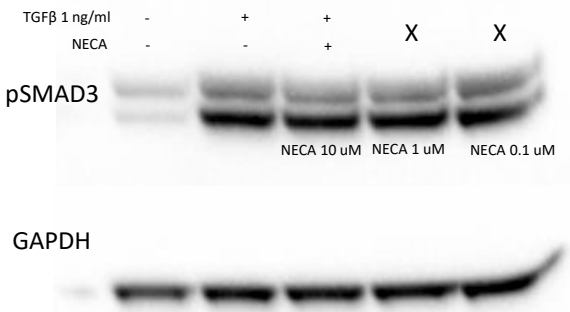

**A, right (A2b-KO)**

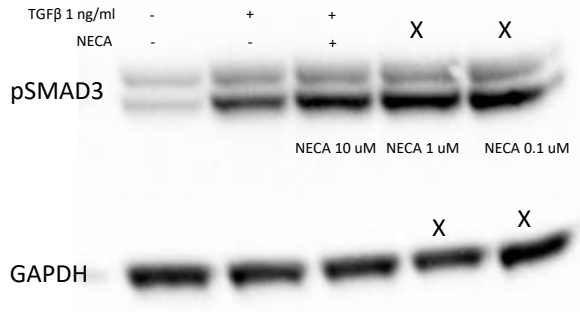

**C**

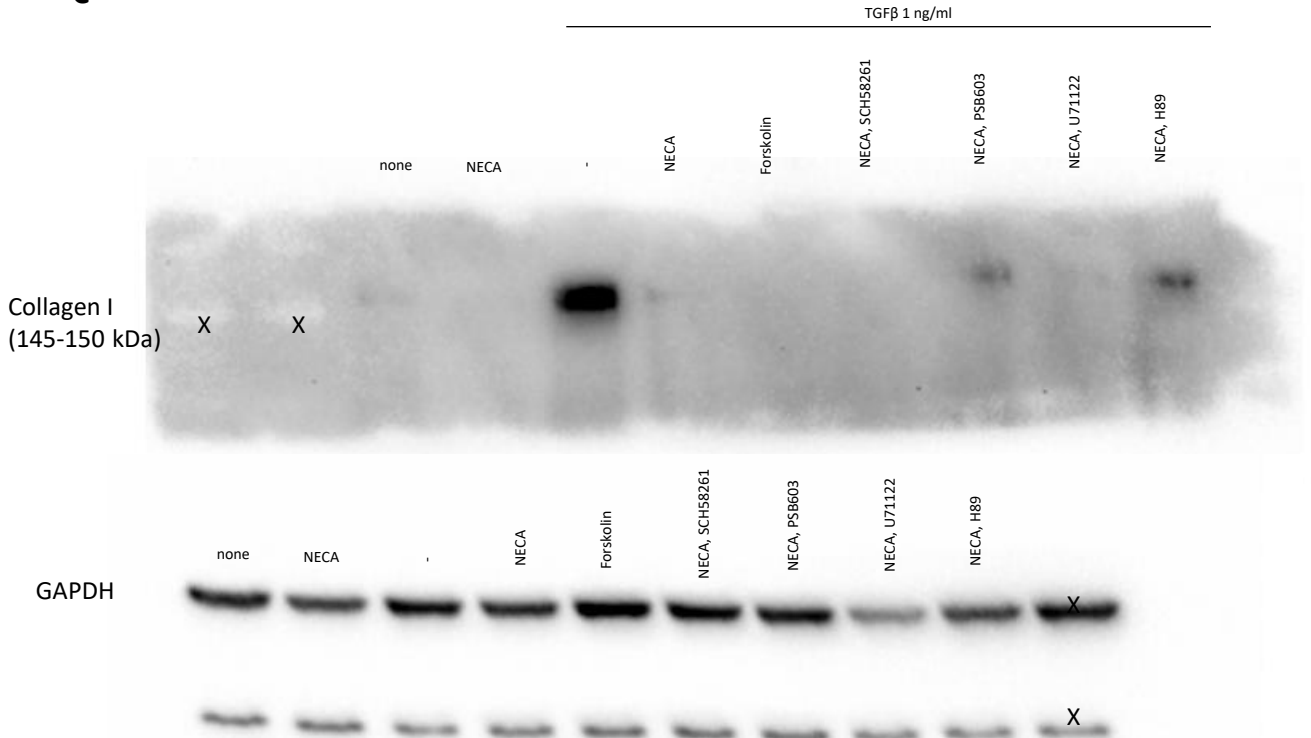

Supplement: pone.0252424.s001.pdf [file pone.0252424.s001.pdf]
